# Supplementary material
Source: PubMed Central journal article supplement (PMC3480970)
Supplement: NIHMS404496-supplement-Supp_Fig_S1-S4.pdf [file NIHMS404496-supplement-Supp_Fig_S1-S4.pdf]

## Online Supporting Information

Elucidation of the multiple roles of CheD in *Bacillus subtilis* chemotaxis

George D. Glekas<sup>1§</sup>, Matthew J. Plutz<sup>1§</sup>, Hanna E. Walukiewicz<sup>1§</sup>, George M. Allen<sup>1</sup>, ,  
Christopher V. Rao<sup>2\*</sup>, and George W. Ordal<sup>1\*</sup>

Department of Biochemistry<sup>1</sup>, Department of Chemical and Biomolecular Engineering<sup>2</sup>,  
University of Illinois at Urbana-Champaign, Urbana, IL 61801

§ Authors contributed equally to this work

\*Corresponding authors.

George W. Ordal, Department of Biochemistry, University of Illinois at Urbana-Champaign, 506 South Mathews Avenue, IL 61801, United States. Phone: (217) 333-9098. Fax: (217) 333-8868. Email: [ordal@illinois.edu](mailto:ordal@illinois.edu).

Christopher V. Rao, Department of Chemical and Biomolecular Engineering, University of Illinois at Urbana-Champaign, 600 South Mathews Avenue, IL 61801, United States. (217) 244-2247. Fax: (217) 333-5052; Email: [chris@scs.uiuc.edu](mailto:chris@scs.uiuc.edu)

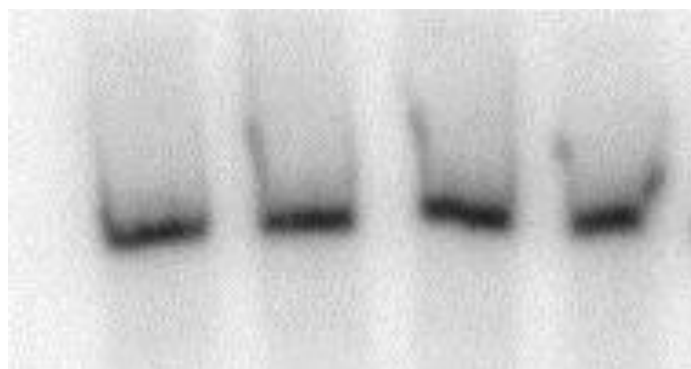

|      |       |       |        |
|------|-------|-------|--------|
| McpC | McpC+ | McpC- | McpC-  |
|      | CheD  | Q609E | Q609E+ |
|      |       |       | CheD   |

**Fig. S1. Western blot of membranes used in the *in vitro* kinase assay.** The *in vitro* kinase assay reactions (which included membrane preparations and various che proteins) were diluted in SDS loading buffer and run on a 12% SDS-PAGE minigel and transferred to PVDF membrane. Anti-McpC antibody was added and the bands were visualized using ECL Plus Western Detection Reagents (GE Healthcare) and imaged with a UVP EpiChem<sup>3</sup> Darkroom and LabWorks Image Acquisition and Analysis Software.

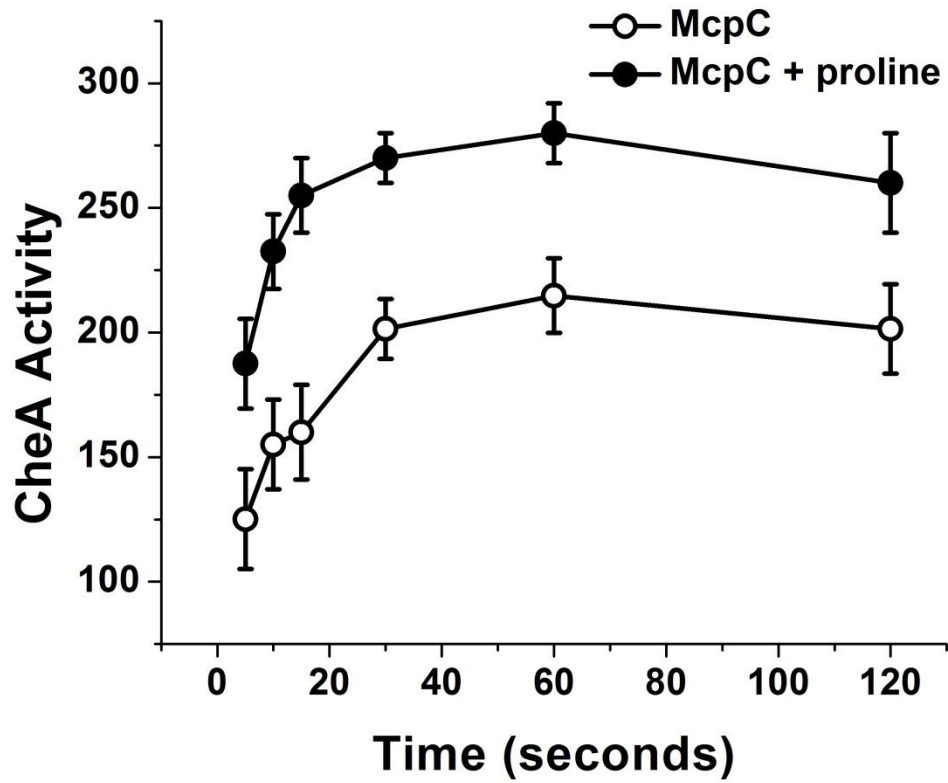

**Fig. S2. McpC *in vitro* kinase assay as a function of time.** An aliquot of the reaction was removed at the indicated time and stopped by addition of SDS loading buffer. The phosphorylation of CheA (as determined by densitometry) is plotted on the graph.

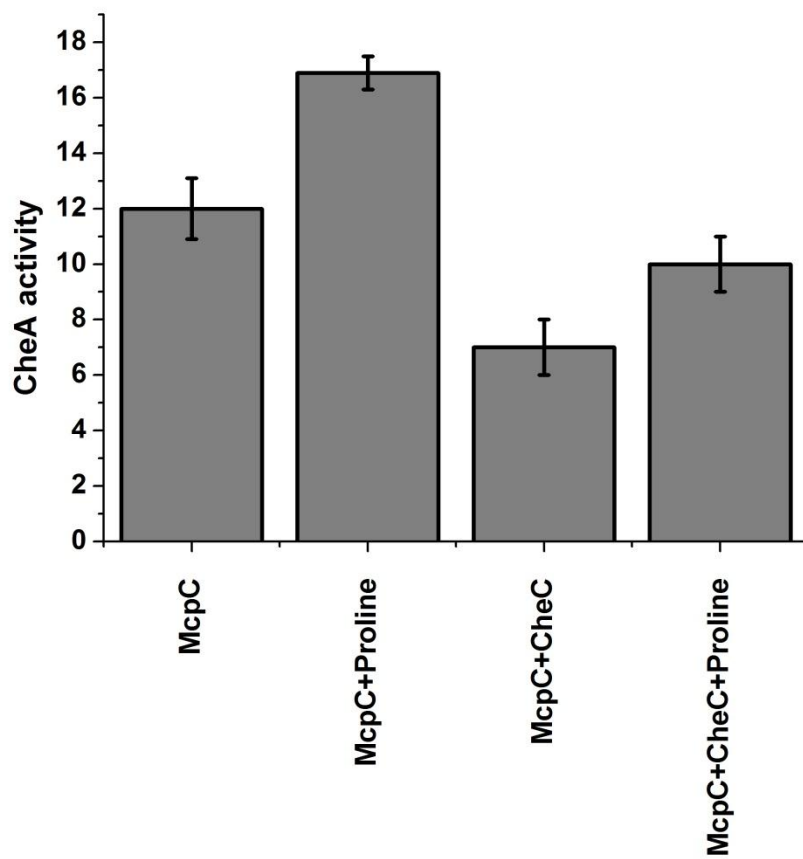

**Fig. S3. Addition of CheC and its effect on CheA phosphorylation in the presence of CheD.** CheC was added to the *in vitro* kinase assay reaction predictably resulted in a decrease in CheA phosphorylation.

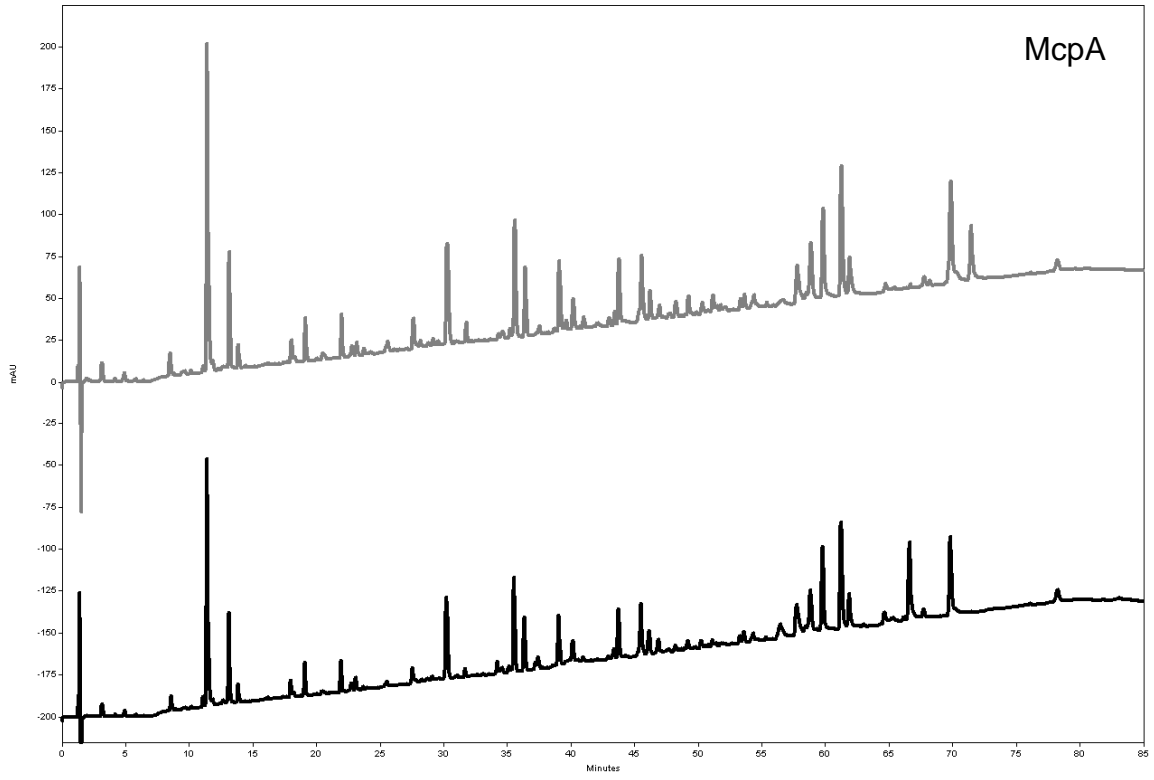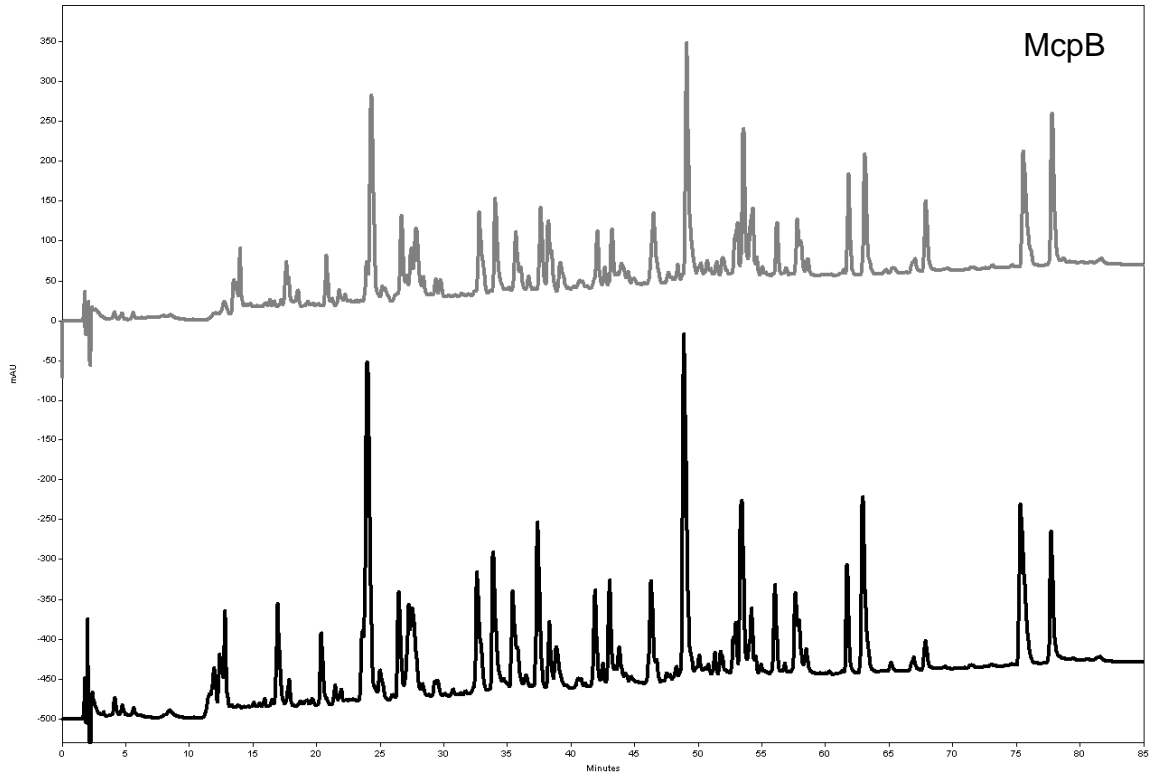

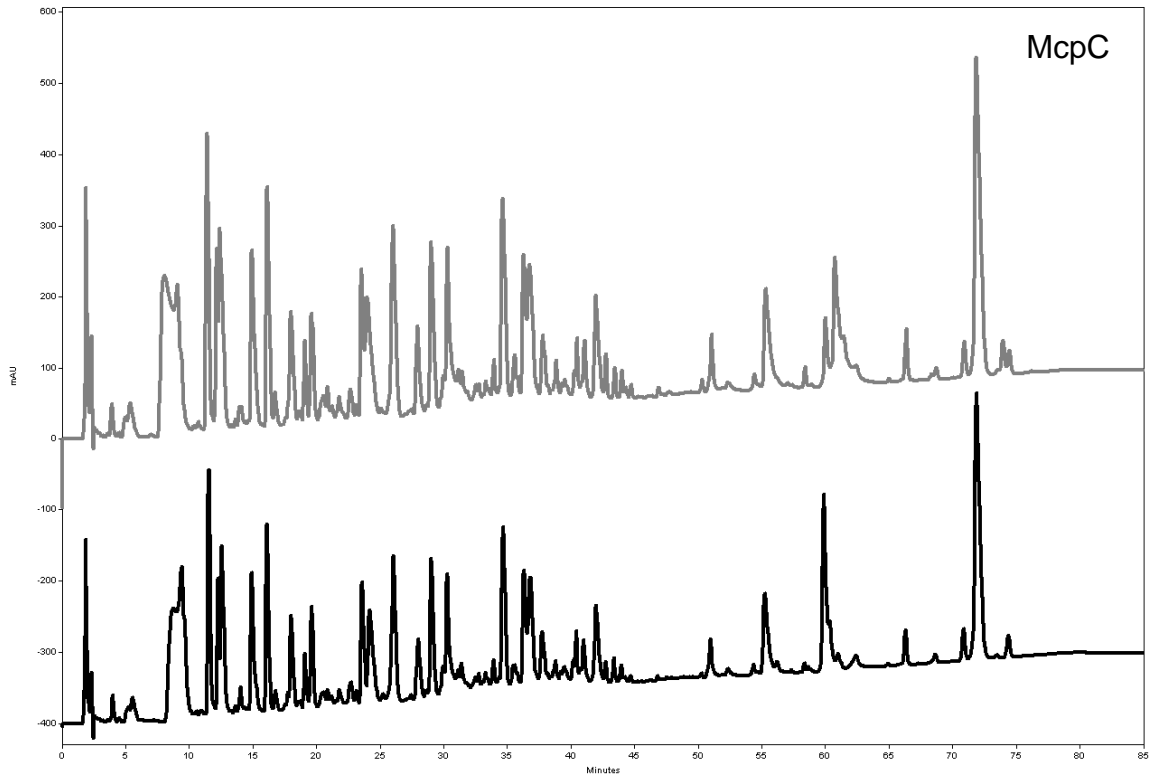

**Fig. S4. Entire HPLC traces of tryptic digestions.** The full-length HPLC traces shown highlighted in Fig. 2 are shown. The black trace is without CheD, the grey trace is with CheD. A change in elution time corresponds to a deamidation.
